# Supplementary material for: Dust deposition fluxes at the gateway to the Southern Ocean: investigating the use of lithogenic tracer measurements in aerosols collected in Tasmania, Australia
Source: Copernicus journal article supplement (doi:10.5194/ar-2024-21), 2024-08-13
Supplement: Supplementary file 1 [file ar-2024-21-supplement.pdf]

# Dust deposition fluxes at the gateway to the Southern Ocean: investigating the use of lithogenic tracer measurements in aerosols collected in Tasmania, Australia

Claudia Hird <sup>a\*</sup>, Morgane M.G. Perron <sup>ab\*</sup>, Thomas M. Holmes <sup>c</sup>, Scott Meyerink <sup>c</sup>, Christopher Nielsen

<sup>a</sup>, Ashley T. Townsend <sup>d</sup>, Patrice de Caritat <sup>e</sup>, Michal Strzelec <sup>a</sup>, Andrew R. Bowie <sup>ac</sup>

<sup>a</sup> Institute for Marine and Antarctic Studies (IMAS), University of Tasmania, Battery Point, Tasmania, Australia.

<sup>b</sup> Université de Brest - UMR 6539 CNRS/UBO/IRD/Ifremer, Laboratoire des sciences de l'environnement marin (LEMAR) - Institut Universitaire Européen de la Mer - Rue Dumont D'Urville, 29280 Plouzané, France

<sup>c</sup> Australian Antarctic Program Partnership (AAPP), University of Tasmania, Battery Point, Tasmania, Australia.

<sup>d</sup> Central Science Laboratory, University of Tasmania, Hobart, Tasmania, Australia

<sup>e</sup> John de Laeter Centre, Curtin University, Bentley WA 6845, Australia

\*Joint first authors

**Table S1.** Arizona Test Dust (ATD, n=6, Morton et al., 2013) and LOESS (GeoPT13, n=6, Potts et al., 2003) reference material mean measurements (conc.), standard deviations ( $\sigma$ ) and recoveries (%) calculated for each lithogenic tracer of interest. Average recoveries for both CRMs also shown.

|                                | Reference value |         | ATD (measured) |          |    | GeoPT13 (measured) |          |    | Both CRMs |
|--------------------------------|-----------------|---------|----------------|----------|----|--------------------|----------|----|-----------|
|                                | ATD             | GeoPT13 | conc.          | $\sigma$ | %  | conc.              | $\sigma$ | %  | %         |
| <b>Th (ng mg<sup>-1</sup>)</b> | 19.4            | 8.1     | 12.0           | 1.0      | 62 | 7.0                | 1.0      | 86 | 73        |
| <b>Ti (%)</b>                  | 0.6             | 0.4     | 0.4            | 0.06     | 81 | 0.3                | 0.09     | 79 | 80        |
| <b>Fe (%)</b>                  | 4.6             | 2.1     | 3.8            | 0.4      | 81 | 2.0                | 0.5      | 93 | 87        |
| <b>Al (%)</b>                  | 12.3            | 6.2     | 10.6           | 1.1      | 85 | 5.7                | 0.9      | 91 | 88        |

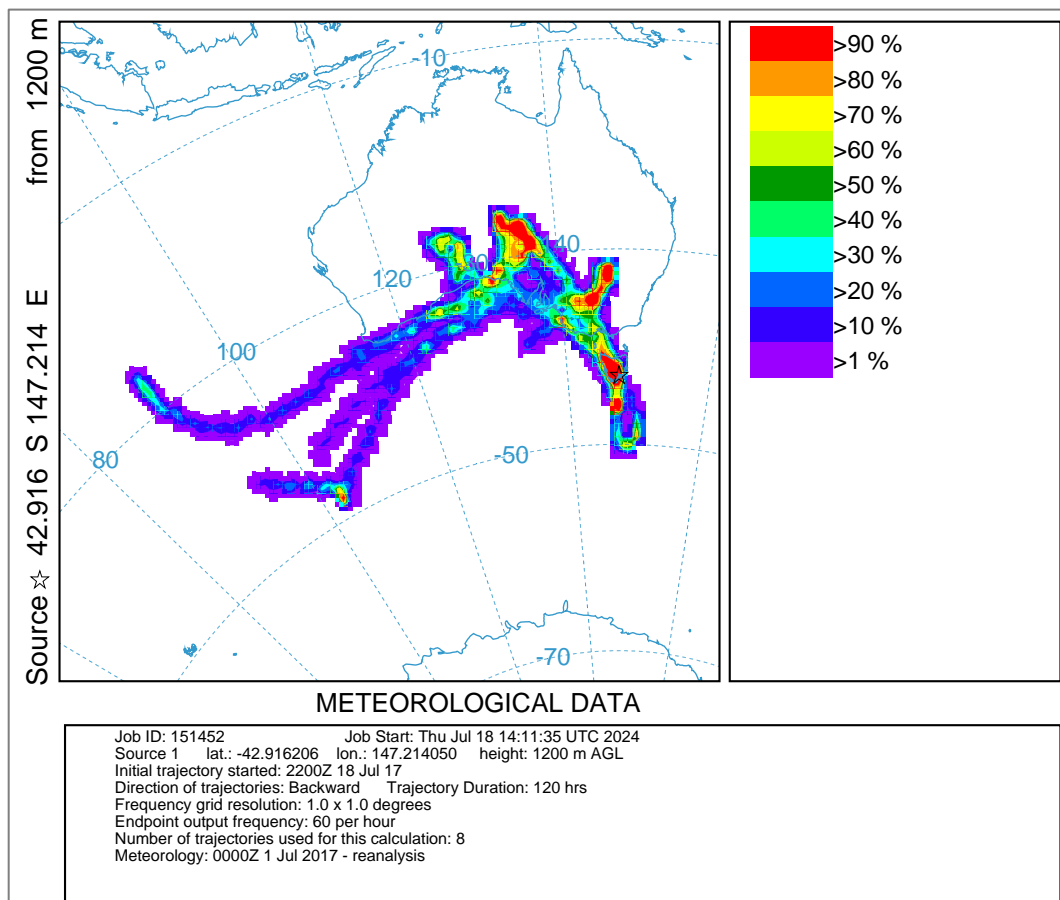

**Figure S1.** HYSPLIT (NOAA), air-mass back-trajectory frequency showing wind occurring at our kunanyi/Mt Wellington aerosol sampling station (1271m of altitude) and originating from the kati thanda/Lake Eyre and dhungala-barka/Murray-Darling geological basins (see Figure 1) less than 5 days earlier. The back-trajectory was run over 10 days ending on the 18<sup>th</sup> of July 2017 as an example.

**Table S2.** Concentrations of total Al, Fe, Th and Ti concentrations (in ng mg<sup>-1</sup>) measured in eleven individual NGSa soil samples collected in South Australia (SA), Victoria (VIC), and Western Australia (WA) and sieved to <63 µm. Mean and standard deviation (σ) values are shown for each region and mean, median and standard deviation, for all samples.

| Region                                           | Abbreviated ID | NGSA site ID  | Total Al | Total Fe | Total Th | Total Ti |
|--------------------------------------------------|----------------|---------------|----------|----------|----------|----------|
| SA                                               | 23             | 2007190223    | 22220    | 19362    | 13       | 9032     |
|                                                  | 26             | 2007190326    | 41613    | 22293    | 5        | 2594     |
|                                                  | 43             | 2007190743    | 39924    | 20788    | 6        | 2461     |
|                                                  | 56             | 2007190256    | 24990    | 19626    | 15       | 7371     |
|                                                  | 88             | 2007190188    | 43743    | 39422    | 15       | 5328     |
|                                                  |                | regional mean |          | 34498    | 24298    | 11       |
|                                                  |                | σ             | 10083    | 8533     | 5        | 2898     |
| VIC                                              | 62             | 2007190162    | 1895     | 942      | 5        | 533      |
|                                                  | 64             | 2007190964    | 62994    | 33011    | 10       | 3829     |
|                                                  | 74             | 2007191374    | 54367    | 25061    | 14       | 4926     |
|                                                  | 93             | 2007190493    | 38617    | 15759    | 7        | 4539     |
|                                                  |                | regional mean |          | 39468    | 18693    | 9        |
|                                                  |                | σ             | 27006    | 13775    | 4        | 2001     |
| WA                                               | 28             | 2007190028    | 53945    | 30708    | 13       | 3995     |
|                                                  | 29             | 2007190029    | 39857    | 21807    | 8        | 2835     |
|                                                  |                | regional mean |          | 46901    | 26258    | 11       |
|                                                  |                | σ             | 9962     | 6294     | 4        | 820      |
| All                                              |                | mean          | 38560    | 22616    | 10       | 4313     |
|                                                  |                | median        | 39924    | 21807    | 10       | 3995     |
|                                                  |                | σ             | 17085    | 10012    | 4        | 2372     |
| Mean metal concentration in UCC (McLennan, 2001) |                |               | 80400    | 45000    | 11       | 41000    |

**Table S3.** Elemental ratios of lithogenic tracers (X = Fe, Th, Ti) in kunanyi/Mt Wellington aerosol samples calculated using Al as the crustal reference element. Thorium was only analyzed during analytical runs undertaken from 2020 onward, hence data is missing for all samples analyzed prior to this date.

| Sample ID | Date       | Fe_Al | Th_Al*   | Ti_Al |
|-----------|------------|-------|----------|-------|
| MW04      | 05/11/2016 | 1.03  | 3.90E-05 | 0.02  |
| MW05      | 12/11/2016 | 1.14  | 9.61E-05 | 0.08  |
| MW06      | 20/11/2016 | 1.16  | 1.00E-04 | 0.07  |
| MW08      | 03/12/2016 | 0.61  |          | 0.08  |
| MW10      | 18/12/2016 | 0.45  |          | 0.02  |
| MW11      | 24/12/2016 | 0.45  |          | 0.02  |
| MW13      | 07/01/2017 | 1.15  | 1.51E-04 | 0.08  |
| MW15      | 14/01/2017 | 0.86  | 1.09E-04 | 0.07  |
| MW17      | 26/01/2017 | 0.54  |          | 0.03  |
| MW18      | 04/02/2017 | 0.94  | 1.28E-04 | 0.08  |
| MW19      | 11/02/2017 | 0.44  |          | 0.01  |
| MW20      | 19/02/2017 | 0.88  | 1.51E-04 | 0.09  |
| MW21      | 27/02/2017 | 0.89  | 1.29E-04 | 0.09  |
| MW23      | 13/03/2017 | 0.56  | 1.22E-04 | 0.06  |
| MW24      | 20/03/2017 | 0.45  |          | 0.02  |
| MW25      | 26/03/2017 | 0.46  |          | 0.07  |
| MW26      | 01/04/2017 | 0.52  |          | 0.03  |
| MW28      | 09/04/2017 | 0.28  |          | 0.01  |
| MW41      | 29/10/2017 | 0.39  |          | 0.03  |
| MW43      | 11/11/2017 | 0.50  |          | 0.02  |
| MW44      | 18/11/2017 | 0.42  |          | 0.03  |
| MW45      | 25/11/2017 | 0.44  |          | 0.01  |
| MW46      | 02/12/2017 | 0.63  | 8.68E-05 | 0.04  |
| MW49      | 16/12/2017 | 0.97  | 1.60E-04 | 0.09  |
| MW50      | 13/12/2017 | 0.73  |          | 0.02  |
| MW51      | 14/12/2017 | 0.86  |          | 0.03  |
| MW52      | 15/12/2017 | 1.05  |          | 0.02  |
| MW53      | 16/12/2017 | 1.22  |          | 0.08  |
| MW54      | 17/12/2017 | 0.87  |          | 0.03  |
| MW55      | 18/12/2017 | 1.00  |          | 0.03  |
| MW58      | 24/12/2017 | 0.83  | 1.42E-04 | 0.09  |
| MW59      | 31/12/2018 | 0.74  | 1.42E-04 | 0.08  |
| MW60      | 06/01/2018 | 0.88  | 1.46E-04 | 0.08  |
| MW61      | 14/01/2018 | 0.79  | 1.40E-04 | 0.10  |
| MW62      | 20/01/2018 | 0.80  | 1.21E-04 | 0.07  |
| MW63      | 28/01/2018 | 1.13  | 8.86E-05 | 0.07  |

|         |            |      |          |      |
|---------|------------|------|----------|------|
| MW64    | 04/02/2018 | 0.96 | 1.02E-04 | 0.08 |
| MW66    | 17/02/2018 | 0.83 | 1.20E-04 | 0.10 |
| MW67    | 24/02/2018 | 0.89 | 8.58E-05 | 0.06 |
| MW68    | 03/03/2018 | 0.88 | 1.60E-04 | 0.08 |
| MW71    | 25/03/2018 | 0.67 | 1.82E-04 | 0.08 |
| MW72    | 01/04/2018 | 0.82 | 1.86E-04 | 0.07 |
| MW82    | 04/01/2019 | 0.81 |          | 0.08 |
| MW83    | 07/01/2019 | 1.23 |          | 0.09 |
| MW84    | 13/01/2019 | 0.83 |          | 0.09 |
| MW85    | 19/01/2019 | 0.80 |          | 0.07 |
| MW86    | 23/01/2019 | 0.90 |          | 0.08 |
| MW87    | 26/01/2019 | 0.66 |          | 0.08 |
| MW88    | 30/01/2019 | 0.78 |          | 0.08 |
| MW89    | 02/02/2019 | 0.68 |          | 0.09 |
| MW90    | 05/02/2019 | 0.97 |          | 0.09 |
| MW91    | 08/02/2019 | 0.92 |          | 0.07 |
| MW92    | 12/02/2019 | 0.92 |          | 0.11 |
| MW94    | 17/02/2019 | 0.89 | 1.65E-04 | 0.07 |
| MW96    | 04/03/2019 | 0.59 | 1.64E-04 | 0.07 |
| MW97    | 14/03/2019 | 0.98 | 1.40E-04 | 0.10 |
| MW98    | 24/03/2019 | 0.73 | 1.60E-04 | 0.08 |
| MW99    | 01/04/2019 | 0.85 | 1.65E-04 | 0.10 |
| MW100   | 09/04/2019 | 0.76 | 1.36E-04 | 0.08 |
| MW111   | 04/11/2019 | 0.61 | 1.74E-04 | 0.07 |
| MW112   | 13/11/2019 | 0.60 | 5.65E-05 | 0.03 |
| MW113   | 24/11/2019 | 0.65 | 1.53E-04 | 0.07 |
| MW114   | 01/12/2019 | 1.34 | 1.25E-04 | 0.07 |
| MW115   | 08/12/2019 | 0.70 | 1.43E-04 | 0.06 |
| MW116   | 14/12/2019 | 1.04 | 9.64E-05 | 0.06 |
| MW118   | 20/12/2019 | 0.79 | 1.81E-04 | 0.08 |
| MW119   | 31/12/2020 | 0.74 | 1.38E-04 | 0.07 |
| MW120   | 08/01/2020 | 0.92 | 1.36E-04 | 0.08 |
| MW120_2 | 13/01/2020 | 0.77 | 1.25E-04 | 0.10 |
| MW121   | 16/01/2020 | 0.78 | 1.36E-04 | 0.06 |
| MW122   | 19/01/2020 | 0.69 | 1.14E-04 | 0.07 |
| MW123   | 25/01/2020 | 0.64 | 1.27E-04 | 0.09 |
| MW124   | 01/02/2020 | 0.54 | 1.50E-04 | 0.06 |
| MW125   | 07/02/2020 | 0.81 | 8.85E-05 | 0.07 |
| MW126   | 14/02/2020 | 0.68 | 1.31E-04 | 0.08 |
| MW127b  | 01/03/2020 | 0.91 | 1.60E-04 | 0.08 |
| MW128   | 06/03/2020 | 0.91 | 2.33E-05 | 0.07 |
| MW129   | 14/03/2020 | 0.79 | 1.55E-04 | 0.08 |
| MW130   | 20/03/2020 | 0.81 | 1.61E-04 | 0.07 |

|       |            |      |          |      |
|-------|------------|------|----------|------|
| MW131 | 27/03/2020 | 0.71 | 2.09E-04 | 0.09 |
| MW132 | 12/04/2020 | 0.69 | 1.07E-04 | 0.07 |
| MW134 | 26/04/2020 | 0.78 | 6.63E-05 | 0.07 |
| MW136 | 11/05/2020 | 0.48 |          | 0.04 |
| MW137 | 17/05/2020 | 0.54 | 2.62E-04 | 0.06 |
| MW138 | 24/05/2020 | 0.49 | 2.03E-03 | 0.07 |
| MW139 | 01/06/2020 | 0.60 | 1.10E-04 | 0.07 |
| MW140 | 07/06/2020 | 0.26 | 2.14E-04 | 0.02 |
| MW141 | 15/06/2020 | 0.27 | 2.12E-05 | 0.01 |
| MW142 | 22/06/2020 | 0.23 | 4.63E-05 | 0.02 |
| MW144 | 15/07/2020 | 0.26 | 3.64E-05 | 0.01 |
| MW145 | 25/07/2020 | 0.63 | 2.59E-03 | 0.08 |
| MW146 | 05/08/2020 | 0.13 | 7.78E-05 | 0.01 |
| MW147 | 19/08/2020 | 0.33 | 1.48E-04 | 0.03 |
| MW148 | 02/09/2020 | 0.59 | 1.46E-04 | 0.07 |
| MW150 | 12/09/2020 | 0.82 | 1.43E-04 | 0.07 |
| MW152 | 06/10/2020 | 0.28 | 5.94E-05 | 0.02 |
| MW153 | 21/10/2020 | 0.78 | 6.00E-05 | 0.05 |
| MW155 | 04/11/2020 | 0.71 | 8.04E-05 | 0.08 |
| MW156 | 09/11/2020 | 0.64 | 9.93E-05 | 0.07 |
| MW157 | 26/11/2020 | 0.56 | 7.90E-05 | 0.06 |
| MW159 | 22/12/2020 | 0.88 | 1.13E-04 | 0.09 |
| MW160 | 31/12/2020 | 1.02 | 9.30E-05 | 0.08 |
| MW161 | 08/01/2021 | 0.92 | 9.49E-05 | 0.07 |
| MW164 | 31/01/2021 | 0.46 | 6.42E-05 | 0.03 |
| MW165 | 06/02/2021 | 0.55 | 8.15E-05 | 0.06 |
| MW166 | 17/02/2021 | 0.73 | 6.88E-05 | 0.07 |
| MW167 | 03/03/2021 | 0.87 | 1.50E-04 | 0.08 |
| MW168 | 19/03/2021 | 0.83 | 8.58E-05 | 0.10 |
| MW169 | 02/04/2021 | 0.76 | 1.70E-04 | 0.06 |
| MW172 | 03/05/2021 | 0.42 | 1.16E-04 | 0.03 |
| MW173 | 13/05/2021 | 1.10 | 1.65E-04 | 0.03 |
| MW174 | 25/05/2021 | 0.23 | 4.74E-05 | 0.02 |
| MW175 | 05/06/2021 | 0.44 | 2.97E-04 | 0.05 |
| MW177 | 20/06/2021 | 0.44 | 4.74E-04 | 0.02 |
| MW179 | 11/07/2021 | 0.56 | 1.96E-04 | 0.02 |
| MW180 | 19/07/2021 | 0.14 |          | 0.00 |
| MW182 | 03/08/2021 | 0.08 | 8.79E-06 | 0.00 |
| MW184 | 24/08/2021 | 0.03 | 3.17E-06 | 0.00 |
| MW187 | 13/09/2021 | 0.22 | 2.67E-04 | 0.02 |
| MW189 | 27/09/2021 | 0.25 | 4.81E-05 | 0.02 |
| MW190 | 04/10/2021 | 0.58 | 2.19E-05 | 0.02 |
| MW193 | 06/11/2021 | 0.59 | 1.14E-04 | 0.05 |

|        |            |      |          |      |
|--------|------------|------|----------|------|
| MW194a | 15/11/2021 | 0.18 | 2.86E-05 | 0.00 |
| MW194b | 25/11/2021 | 0.33 | 1.10E-04 | 0.02 |
| MW195  | 04/12/2021 | 0.77 | 1.61E-04 | 0.09 |

---

**Table S4.** Lithogenic deposition fluxes ( $FLith_{(X)}$ ,  $mg\ m^{-2}\ d^{-1}$ ) calculated based on the analysis of individual tracer “X” (X=Al, Fe, Th or Ti) in aerosol samples collected at kunanyi/Mt Wellington.  $FLith_{(X)}$  are calculated based on the relative abundance of each tracer in the UCC (McLennan, 2001). The average of all four  $FLith_{(X)}$  for a single sample is called  $FLith_{(AV)}$  and is displayed with its standard deviation ( $\sigma$ ). Dates correspond to the sample’s mid-sampling collection time. Thorium was only analyzed during analytical runs undertaken from 2020 onward, hence data is missing for all samples analyzed prior to this date.

| Sample ID | Date       | $Flith_{(Al)}$ | $Flith_{(Fe)}$ | $Flith_{(Th)}$ | $Flith_{(Ti)}$ | $Flith_{(AV)}$ | $\sigma$ |
|-----------|------------|----------------|----------------|----------------|----------------|----------------|----------|
| MW04      | 05/11/2016 | 0.33           | 0.77           | 0.10           | 0.16           | 0.34           | 0.31     |
| MW05      | 12/11/2016 | 0.58           | 1.51           | 0.42           | 0.86           | 0.84           | 0.48     |
| MW06      | 20/11/2016 | 0.28           | 0.74           | 0.21           | 0.38           | 0.40           | 0.24     |
| MW08      | 03/12/2016 | 1.88           | 2.64           |                | 3.06           | 2.53           | 0.60     |
| MW10      | 18/12/2016 | 1.79           | 1.86           |                | 0.68           | 1.44           | 0.66     |
| MW11      | 24/12/2016 | 3.80           | 3.92           |                | 1.72           | 3.15           | 1.24     |
| MW13      | 07/01/2017 | 1.60           | 4.23           | 1.81           | 2.48           | 2.53           | 1.19     |
| MW15      | 14/01/2017 | 0.26           | 0.51           | 0.21           | 0.35           | 0.33           | 0.13     |
| MW17      | 26/01/2017 | 0.97           | 1.21           |                | 0.54           | 0.91           | 0.34     |
| MW18      | 04/02/2017 | 0.42           | 0.90           | 0.40           | 0.69           | 0.60           | 0.24     |
| MW19      | 11/02/2017 | 0.97           | 0.97           |                | 0.25           | 0.73           | 0.42     |
| MW20      | 19/02/2017 | 0.83           | 1.66           | 0.94           | 1.48           | 1.23           | 0.41     |
| MW21      | 27/02/2017 | 2.04           | 4.18           | 1.98           | 3.64           | 2.96           | 1.12     |
| MW23      | 13/03/2017 | 3.11           | 3.99           | 2.86           | 3.71           | 3.42           | 0.52     |
| MW24      | 20/03/2017 | 2.63           | 2.69           |                | 1.29           | 2.20           | 0.80     |
| MW25      | 26/03/2017 | 1.26           | 1.32           |                | 1.78           | 1.45           | 0.29     |
| MW26      | 01/04/2017 | 1.49           | 1.78           |                | 0.81           | 1.36           | 0.50     |
| MW28      | 09/04/2017 | 8.41           | 5.50           |                | 1.87           |                |          |
| MW41      | 29/10/2017 | 2.00           | 1.77           |                | 1.16           |                |          |
| MW43      | 11/11/2017 | 5.67           | 6.53           |                | 2.58           | 4.93           | 2.08     |
| MW44      | 18/11/2017 | 3.62           | 3.52           |                | 1.80           | 2.98           | 1.02     |
| MW45      | 25/11/2017 | 5.13           | 5.21           |                | 1.21           | 3.85           | 2.28     |
| MW46      | 02/12/2017 | 1.07           | 1.54           | 0.69           | 0.91           | 1.05           | 0.36     |
| MW49      | 16/12/2017 | 1.57           | 3.48           | 1.88           | 2.62           | 2.39           | 0.85     |
| MW50      | 13/12/2017 | 3.87           | 6.46           |                | 1.86           | 4.07           | 2.31     |
| MW51      | 14/12/2017 | 0.37           | 0.73           |                | 0.20           | 0.43           | 0.27     |
| MW52      | 15/12/2017 | 1.18           | 2.84           |                | 0.53           | 1.52           | 1.19     |
| MW53      | 16/12/2017 | 0.11           | 0.31           |                | 0.17           | 0.20           | 0.10     |
| MW54      | 17/12/2017 | 1.93           | 3.84           |                | 1.11           | 2.30           | 1.40     |
| MW55      | 18/12/2017 | 3.57           | 8.18           |                | 2.14           | 4.63           | 3.16     |
| MW58      | 24/12/2017 | 0.47           | 0.89           | 0.50           | 0.81           | 0.67           | 0.22     |
| MW59      | 31/12/2018 | 1.07           | 1.83           | 1.15           | 1.60           |                |          |
| MW60      | 06/01/2018 | 1.02           | 2.06           | 1.12           | 1.64           | 1.46           | 0.48     |
| MW61      | 14/01/2018 | 1.31           | 2.38           | 1.38           | 2.44           | 1.88           | 0.62     |
| MW62      | 20/01/2018 | 1.74           | 3.21           | 1.59           | 2.36           | 2.23           | 0.74     |



|         |            |      |       |      |       |      |      |
|---------|------------|------|-------|------|-------|------|------|
| MW63    | 28/01/2018 | 0.50 | 1.30  | 0.33 | 0.69  | 0.70 | 0.42 |
| MW64    | 04/02/2018 | 1.23 | 2.70  | 0.94 | 2.05  | 1.73 | 0.80 |
| MW66    | 17/02/2018 | 1.29 | 2.46  | 1.16 | 2.62  | 1.88 | 0.76 |
| MW67    | 24/02/2018 | 0.16 | 0.33  | 0.10 | 0.19  | 0.20 | 0.10 |
| MW68    | 03/03/2018 | 1.07 | 2.15  | 1.28 | 1.72  | 1.55 | 0.48 |
| MW71    | 25/03/2018 | 0.92 | 1.42  | 1.26 | 1.45  | 1.26 | 0.24 |
| MW72    | 01/04/2018 | 0.30 | 0.56  | 0.42 | 0.43  |      |      |
| MW82    | 04/01/2019 | 3.43 | 6.40  |      | 5.71  |      |      |
| MW83    | 07/01/2019 | 1.14 | 3.22  |      | 1.94  | 2.10 | 1.05 |
| MW84    | 13/01/2019 | 3.73 | 7.14  |      | 6.90  | 5.92 | 1.90 |
| MW85    | 19/01/2019 | 2.01 | 3.70  |      | 2.70  | 2.81 | 0.85 |
| MW86    | 23/01/2019 | 1.84 | 3.80  |      | 2.91  | 2.85 | 0.98 |
| MW87    | 26/01/2019 | 6.83 | 10.36 |      | 10.49 | 9.23 | 2.08 |
| MW88    | 30/01/2019 | 2.24 | 4.00  |      | 3.54  | 3.26 | 0.91 |
| MW89    | 02/02/2019 | 2.21 | 3.45  |      | 4.05  | 3.24 | 0.94 |
| MW90    | 05/02/2019 | 1.65 | 3.67  |      | 2.84  | 2.72 | 1.02 |
| MW91    | 08/02/2019 | 0.25 | 0.52  |      | 0.33  | 0.37 | 0.14 |
| MW92    | 12/02/2019 | 0.10 | 0.21  |      | 0.22  | 0.18 | 0.07 |
| MW94    | 17/02/2019 | 0.57 | 1.16  | 0.70 | 0.82  | 0.81 | 0.26 |
| MW96    | 04/03/2019 | 6.30 | 8.52  | 7.78 | 8.82  | 7.85 | 1.12 |
| MW97    | 14/03/2019 | 0.98 | 2.22  | 1.04 | 1.94  | 1.55 | 0.63 |
| MW98    | 24/03/2019 | 0.54 | 0.91  | 0.65 | 0.86  | 0.74 | 0.17 |
| MW99    | 01/04/2019 | 0.86 | 1.68  | 1.06 | 1.71  | 1.33 | 0.43 |
| MW100   | 09/04/2019 | 0.44 | 0.77  | 0.45 | 0.73  |      |      |
| MW111   | 04/11/2019 | 3.66 | 5.13  | 4.80 | 5.11  |      |      |
| MW112   | 13/11/2019 | 1.15 | 1.60  | 0.49 | 0.60  | 0.96 | 0.51 |
| MW113   | 24/11/2019 | 3.98 | 5.97  | 4.57 | 5.33  | 4.96 | 0.87 |
| MW114   | 01/12/2019 | 0.13 | 0.40  | 0.12 | 0.18  | 0.21 | 0.13 |
| MW115   | 08/12/2019 | 1.11 | 1.78  | 1.20 | 1.35  | 1.36 | 0.30 |
| MW116   | 14/12/2019 | 0.19 | 0.46  | 0.14 | 0.24  | 0.26 | 0.14 |
| MW118   | 20/12/2019 | 2.07 | 3.78  | 2.82 | 3.17  | 2.96 | 0.71 |
| MW119   | 31/12/2020 | 1.58 | 2.70  | 1.64 | 2.25  | 2.04 | 0.53 |
| MW120   | 08/01/2020 | 2.80 | 5.90  | 2.87 | 4.55  | 4.03 | 1.48 |
| MW120_2 | 13/01/2020 | 2.23 | 3.92  | 2.09 | 4.18  | 3.11 | 1.10 |
| MW121   | 16/01/2020 | 7.13 | 12.71 | 7.30 | 8.97  | 9.03 | 2.59 |
| MW122   | 19/01/2020 | 1.65 | 2.63  | 1.42 | 2.24  | 1.98 | 0.55 |
| MW123   | 25/01/2020 | 3.42 | 4.99  | 3.27 | 5.78  | 4.36 | 1.22 |
| MW124   | 01/02/2020 | 3.05 | 3.76  | 3.44 | 3.59  | 3.46 | 0.31 |
| MW125   | 07/02/2020 | 1.51 | 2.81  | 1.00 | 2.13  | 1.86 | 0.78 |
| MW126   | 14/02/2020 | 1.21 | 1.91  | 1.19 | 1.83  | 1.54 | 0.39 |
| MW127b  | 01/03/2020 | 0.24 | 0.51  | 0.29 | 0.40  | 0.36 | 0.12 |
| MW128   | 06/03/2020 | 1.42 | 2.97  | 0.25 | 1.82  | 1.61 | 1.12 |
| MW129   | 14/03/2020 | 1.64 | 2.98  | 1.91 | 2.63  | 2.29 | 0.62 |

|       |            |      |      |      |      |      |      |
|-------|------------|------|------|------|------|------|------|
| MW130 | 20/03/2020 | 1.05 | 1.95 | 1.27 | 1.35 | 1.40 | 0.38 |
| MW131 | 27/03/2020 | 1.93 | 3.13 | 3.04 | 3.31 | 2.85 | 0.62 |
| MW132 | 12/04/2020 | 0.21 | 0.32 | 0.16 | 0.30 | 0.25 | 0.08 |
| MW134 | 26/04/2020 | 0.13 | 0.24 | 0.06 | 0.21 | 0.16 | 0.08 |
| MW136 | 11/05/2020 | 0.06 | 0.06 |      | 0.04 | 0.06 | 0.01 |
| MW137 | 17/05/2020 | 0.74 | 0.92 | 1.45 | 0.94 | 1.01 | 0.31 |
| MW138 | 24/05/2020 | 0.08 | 0.08 | 1.15 | 0.10 | 0.35 | 0.53 |
| MW139 | 01/06/2020 | 0.31 | 0.43 | 0.26 | 0.43 | 0.36 | 0.09 |
| MW140 | 07/06/2020 | 0.08 | 0.05 | 0.13 | 0.03 | 0.07 | 0.04 |
| MW141 | 15/06/2020 | 1.09 | 0.67 | 0.17 | 0.23 | 0.54 | 0.43 |
| MW142 | 22/06/2020 | 0.91 | 0.49 | 0.32 | 0.32 | 0.51 | 0.28 |
| MW144 | 15/07/2020 | 0.83 | 0.49 | 0.23 | 0.22 | 0.44 | 0.29 |
| MW145 | 25/07/2020 | 0.08 | 0.11 | 1.53 | 0.13 | 0.46 | 0.71 |
| MW146 | 05/08/2020 | 0.70 | 0.21 | 0.41 | 0.11 | 0.36 | 0.26 |
| MW147 | 19/08/2020 | 0.35 | 0.27 | 0.39 | 0.19 | 0.30 | 0.09 |
| MW148 | 02/09/2020 | 0.82 | 1.12 | 0.90 | 1.08 | 0.98 | 0.14 |
| MW150 | 12/09/2020 | 0.30 | 0.55 | 0.32 | 0.40 | 0.39 | 0.12 |
| MW152 | 06/10/2020 | 1.85 | 1.19 | 0.82 | 0.77 | 1.16 | 0.50 |
| MW153 | 21/10/2020 | 0.82 | 1.48 | 0.37 | 0.79 | 0.86 | 0.46 |
| MW155 | 04/11/2020 | 0.62 | 1.00 | 0.37 | 0.93 | 0.73 | 0.29 |
| MW156 | 09/11/2020 | 2.71 | 3.96 | 2.02 | 3.79 | 3.12 | 0.92 |
| MW157 | 26/11/2020 | 1.54 | 1.97 | 0.92 | 1.80 | 1.56 | 0.46 |
| MW159 | 22/12/2020 | 0.30 | 0.61 | 0.26 | 0.54 | 0.43 | 0.17 |
| MW160 | 31/12/2020 | 0.33 | 0.76 | 0.23 | 0.51 | 0.45 | 0.23 |
| MW161 | 08/01/2021 | 1.08 | 2.27 | 0.77 | 1.49 | 1.40 | 0.65 |
| MW164 | 31/01/2021 | 0.80 | 0.85 | 0.39 | 0.51 | 0.64 | 0.22 |
| MW165 | 06/02/2021 | 1.00 | 1.26 | 0.61 | 1.12 | 1.00 | 0.28 |
| MW166 | 17/02/2021 | 1.48 | 2.48 | 0.77 | 2.06 | 1.70 | 0.74 |
| MW167 | 03/03/2021 | 0.50 | 0.99 | 0.56 | 0.73 | 0.69 | 0.22 |
| MW168 | 19/03/2021 | 2.10 | 3.99 | 1.36 | 4.13 | 2.90 | 1.38 |
| MW169 | 02/04/2021 | 0.74 | 1.29 | 0.94 | 0.93 | 0.98 | 0.23 |
| MW172 | 03/05/2021 | 4.56 | 4.37 | 3.99 | 3.06 | 3.99 | 0.67 |
| MW173 | 13/05/2021 | 0.35 | 0.88 | 0.43 | 0.21 | 0.47 | 0.29 |
| MW174 | 25/05/2021 | 1.75 | 0.94 | 0.62 | 0.56 | 0.97 | 0.55 |
| MW175 | 05/06/2021 | 0.41 | 0.41 | 0.91 | 0.38 | 0.53 | 0.25 |
| MW177 | 20/06/2021 | 0.15 | 0.15 | 0.52 | 0.06 | 0.22 | 0.20 |
| MW179 | 11/07/2021 | 0.37 | 0.48 | 0.55 | 0.14 | 0.39 | 0.18 |
| MW180 | 19/07/2021 | 0.46 | 0.15 |      | 0.04 | 0.21 | 0.22 |
| MW182 | 03/08/2021 | 1.52 | 0.28 | 0.10 | 0.14 | 0.51 | 0.68 |
| MW184 | 24/08/2021 | 2.10 | 0.17 | 0.05 | 0.06 | 0.59 | 1.01 |
| MW187 | 13/09/2021 | 1.66 | 0.84 | 3.33 | 0.50 | 1.59 | 1.26 |
| MW189 | 27/09/2021 | 1.30 | 0.75 | 0.47 | 0.45 | 0.74 | 0.40 |
| MW190 | 04/10/2021 | 0.21 | 0.28 | 0.03 | 0.10 | 0.16 | 0.11 |

|        |            |      |      |      |      |      |      |
|--------|------------|------|------|------|------|------|------|
| MW193  | 06/11/2021 | 1.23 | 1.66 | 1.05 | 1.28 | 1.31 | 0.26 |
| MW194a | 15/11/2021 | 2.30 | 0.93 | 0.49 | 0.14 | 0.97 | 0.94 |
| MW194b | 25/11/2021 | 1.43 | 1.09 | 1.18 | 0.56 | 1.07 | 0.36 |
| MW195  | 04/12/2021 | 5.49 | 9.67 | 6.62 | 9.64 | 7.85 | 2.13 |

---

**Table S5.** Average lithogenic deposition fluxes ( $FLith_{(Av)}$ ,  $mg\ m^{-2}\ d^{-1}$ ) calculated based on the relative abundance of each tracer in the UCC ( $FLith_{(Av)}/UCC$ , McLennan, 2001) and based on measurements in Australian soil samples ( $FLith_{(Av)}/Aus$ , this study) together with the associated standard deviations ( $\sigma$ ).

| <b>Sample ID</b> | <b>Date</b> | <b><math>FLith_{(Av)}/UCC</math></b> | <b><math>\sigma</math></b> | <b><math>FLith_{(Av)}/Aus</math></b> | <b><math>\sigma</math></b> |
|------------------|-------------|--------------------------------------|----------------------------|--------------------------------------|----------------------------|
| MW04             | 05/11/2016  | 0.34                                 | 0.31                       | 0.58                                 | 0.57                       |
| MW05             | 12/11/2016  | 0.84                                 | 0.48                       | 1.29                                 | 0.92                       |
| MW06             | 20/11/2016  | 0.40                                 | 0.24                       | 0.62                                 | 0.45                       |
| MW08             | 03/12/2016  | 2.53                                 | 0.60                       | 3.90                                 | 0.93                       |
| MW10             | 18/12/2016  | 1.44                                 | 0.66                       | 2.65                                 | 1.84                       |
| MW11             | 24/12/2016  | 3.14                                 | 1.24                       | 5.71                                 | 3.76                       |
| MW13             | 07/01/2017  | 2.53                                 | 1.19                       | 3.79                                 | 2.35                       |
| MW15             | 14/01/2017  | 0.33                                 | 0.13                       | 0.50                                 | 0.28                       |
| MW17             | 26/01/2017  | 0.90                                 | 0.34                       | 1.61                                 | 0.97                       |
| MW18             | 04/02/2017  | 0.60                                 | 0.24                       | 0.89                                 | 0.47                       |
| MW19             | 11/02/2017  | 0.73                                 | 0.42                       | 1.38                                 | 1.05                       |
| MW20             | 19/02/2017  | 1.23                                 | 0.41                       | 1.79                                 | 0.77                       |
| MW21             | 27/02/2017  | 2.95                                 | 1.12                       | 4.35                                 | 2.09                       |
| MW23             | 13/03/2017  | 3.42                                 | 0.52                       | 5.16                                 | 2.18                       |
| MW24             | 20/03/2017  | 2.20                                 | 0.80                       | 3.97                                 | 2.56                       |
| MW25             | 26/03/2017  | 1.45                                 | 0.29                       | 2.28                                 | 0.66                       |
| MW26             | 01/04/2017  | 1.36                                 | 0.50                       | 2.42                                 | 1.47                       |
| MW28             | 09/04/2017  | 5.26                                 | 3.28                       | 10.27                                | 9.10                       |
| MW41             | 29/10/2017  | 1.64                                 | 0.43                       | 2.92                                 | 1.82                       |
| MW43             | 11/11/2017  | 4.93                                 | 2.08                       | 8.91                                 | 5.78                       |
| MW44             | 18/11/2017  | 2.98                                 | 1.02                       | 5.37                                 | 3.47                       |
| MW45             | 25/11/2017  | 3.85                                 | 2.28                       | 7.33                                 | 5.63                       |
| MW46             | 02/12/2017  | 1.05                                 | 0.36                       | 1.68                                 | 1.01                       |
| MW49             | 16/12/2017  | 2.39                                 | 0.85                       | 3.51                                 | 1.71                       |
| MW50             | 13/12/2017  | 4.07                                 | 2.30                       | 7.24                                 | 4.86                       |
| MW51             | 14/12/2017  | 0.43                                 | 0.27                       | 0.76                                 | 0.53                       |
| MW52             | 15/12/2017  | 1.52                                 | 1.20                       | 2.68                                 | 2.15                       |
| MW53             | 16/12/2017  | 0.20                                 | 0.10                       | 0.32                                 | 0.19                       |
| MW54             | 17/12/2017  | 2.30                                 | 1.40                       | 4.02                                 | 2.76                       |
| MW55             | 18/12/2017  | 4.63                                 | 3.16                       | 8.05                                 | 5.90                       |
| MW58             | 24/12/2017  | 0.66                                 | 0.22                       | 0.97                                 | 0.42                       |
| MW59             | 31/12/2017  | 1.41                                 | 0.36                       | 2.09                                 | 0.86                       |
| MW60             | 06/01/2018  | 1.46                                 | 0.48                       | 2.16                                 | 1.00                       |
| MW61             | 14/01/2018  | 1.88                                 | 0.62                       | 2.72                                 | 1.07                       |
| MW62             | 20/01/2018  | 2.22                                 | 0.74                       | 3.36                                 | 1.70                       |
| MW63             | 28/01/2018  | 0.70                                 | 0.42                       | 1.09                                 | 0.80                       |

|         |            |      |       |       |      |
|---------|------------|------|-------|-------|------|
| MW64    | 04/02/2018 | 1.73 | 0.80  | 2.59  | 1.51 |
| MW66    | 17/02/2018 | 1.88 | 0.76  | 2.71  | 1.19 |
| MW67    | 24/02/2018 | 0.20 | 0.10  | 0.31  | 0.20 |
| MW68    | 03/03/2018 | 1.55 | 0.48  | 2.28  | 1.01 |
| MW71    | 25/03/2018 | 1.26 | 0.24  | 1.82  | 0.54 |
| MW72    | 01/04/2018 | 0.43 | 0.11  | 0.63  | 0.25 |
| MW82    | 04/01/2019 | 5.18 | 1.55  | 8.04  | 2.75 |
| MW83    | 07/01/2019 | 2.10 | 1.05  | 3.29  | 1.88 |
| MW84    | 13/01/2019 | 5.92 | 1.90  | 9.06  | 2.83 |
| MW85    | 19/01/2019 | 2.80 | 0.85  | 4.49  | 1.88 |
| MW86    | 23/01/2019 | 2.85 | 0.98  | 4.47  | 1.86 |
| MW87    | 26/01/2019 | 9.23 | 2.08  | 14.41 | 4.14 |
| MW88    | 30/01/2019 | 3.26 | 0.91  | 5.09  | 1.73 |
| MW89    | 02/02/2019 | 3.24 | 0.94  | 4.92  | 1.06 |
| MW90    | 05/02/2019 | 2.72 | 1.02  | 4.22  | 1.80 |
| MW91    | 08/02/2019 | 0.37 | 0.140 | 0.59  | 0.28 |
| MW92    | 12/02/2019 | 0.18 | 0.07  | 0.27  | 0.10 |
| MW94    | 17/02/2019 | 0.81 | 0.25  | 1.20  | 0.57 |
| MW96    | 04/03/2019 | 7.85 | 1.12  | 11.48 | 3.61 |
| MW97    | 14/03/2019 | 1.55 | 0.63  | 2.25  | 1.10 |
| MW98    | 24/03/2019 | 0.74 | 0.17  | 1.08  | 0.39 |
| MW99    | 01/04/2019 | 1.33 | 0.43  | 1.90  | 0.71 |
| MW100   | 09/04/2019 | 0.60 | 0.18  | 0.87  | 0.36 |
| MW111   | 04/11/2019 | 4.67 | 0.69  | 6.81  | 2.10 |
| MW112   | 13/11/2019 | 0.96 | 0.51  | 1.62  | 1.24 |
| MW113   | 24/11/2019 | 4.96 | 0.87  | 7.35  | 2.75 |
| MW114   | 01/12/2019 | 0.21 | 0.13  | 0.32  | 0.25 |
| MW115   | 08/12/2019 | 1.36 | 0.30  | 2.05  | 0.90 |
| MW116   | 14/12/2019 | 0.26 | 0.14  | 0.40  | 0.28 |
| MW118   | 20/12/2019 | 2.96 | 0.71  | 4.32  | 1.62 |
| MW119   | 31/12/2019 | 2.04 | 0.53  | 3.04  | 1.31 |
| MW120   | 08/01/2020 | 4.03 | 1.48  | 5.98  | 3.00 |
| MW120_2 | 13/01/2020 | 3.10 | 1.10  | 4.50  | 1.84 |
| MW121   | 16/01/2020 | 9.03 | 2.59  | 13.63 | 6.58 |
| MW122   | 19/01/2020 | 1.98 | 0.55  | 2.98  | 1.38 |
| MW123   | 25/01/2020 | 4.36 | 1.22  | 6.35  | 2.29 |
| MW124   | 01/02/2020 | 3.46 | 0.30  | 5.16  | 1.89 |
| MW125   | 07/02/2020 | 1.86 | 0.78  | 2.84  | 1.62 |
| MW126   | 14/02/2020 | 1.54 | 0.39  | 2.27  | 0.91 |
| MW127b  | 01/03/2020 | 0.36 | 0.12  | 0.53  | 0.24 |
| MW128   | 06/03/2020 | 1.61 | 1.12  | 2.57  | 2.04 |

|       |            |      |       |      |      |
|-------|------------|------|-------|------|------|
| MW129 | 14/03/2020 | 2.29 | 0.62  | 3.35 | 1.35 |
| MW130 | 20/03/2020 | 1.40 | 0.38  | 2.10 | 0.95 |
| MW131 | 27/03/2020 | 2.85 | 0.62  | 4.06 | 1.03 |
| MW132 | 12/04/2020 | 0.25 | 0.07  | 0.37 | 0.17 |
| MW134 | 26/04/2020 | 0.16 | 0.08  | 0.24 | 0.14 |
| MW136 | 11/05/2020 | 0.06 | 0.01  | 0.10 | 0.05 |
| MW137 | 17/05/2020 | 1.01 | 0.31  | 1.44 | 0.39 |
| MW138 | 24/05/2020 | 0.35 | 0.53  | 0.42 | 0.56 |
| MW139 | 01/06/2020 | 0.36 | 0.09  | 0.54 | 0.23 |
| MW140 | 07/06/2020 | 0.07 | 0.04  | 0.11 | 0.07 |
| MW141 | 15/06/2020 | 0.54 | 0.43  | 1.02 | 1.12 |
| MW142 | 22/06/2020 | 0.51 | 0.28  | 0.90 | 0.86 |
| MW144 | 15/07/2020 | 0.44 | 0.29  | 0.81 | 0.81 |
| MW145 | 25/07/2020 | 0.46 | 0.71  | 0.55 | 0.76 |
| MW146 | 05/08/2020 | 0.36 | 0.26  | 0.64 | 0.69 |
| MW147 | 19/08/2020 | 0.30 | 0.09  | 0.47 | 0.27 |
| MW148 | 02/09/2020 | 0.98 | 0.14  | 1.45 | 0.53 |
| MW150 | 12/09/2020 | 0.39 | 0.12  | 0.59 | 0.28 |
| MW152 | 06/10/2020 | 1.16 | 0.50  | 2.00 | 1.68 |
| MW153 | 21/10/2020 | 0.86 | 0.46  | 1.39 | 0.98 |
| MW155 | 04/11/2020 | 0.73 | 0.29  | 1.10 | 0.58 |
| MW156 | 09/11/2020 | 3.12 | 0.92  | 4.70 | 2.18 |
| MW157 | 26/11/2020 | 1.56 | 0.46  | 2.40 | 1.27 |
| MW159 | 22/12/2020 | 0.43 | 0.17  | 0.63 | 0.32 |
| MW160 | 31/12/2020 | 0.45 | 0.23  | 0.69 | 0.44 |
| MW161 | 08/01/2021 | 1.40 | 0.65  | 2.15 | 1.32 |
| MW164 | 31/01/2021 | 0.64 | 0.22  | 1.05 | 0.73 |
| MW165 | 06/02/2021 | 1.00 | 0.278 | 1.55 | 0.82 |
| MW166 | 17/02/2021 | 1.70 | 0.74  | 2.60 | 1.51 |
| MW167 | 03/03/2021 | 0.69 | 0.22  | 1.03 | 0.49 |
| MW168 | 19/03/2021 | 2.90 | 1.38  | 4.25 | 2.19 |
| MW169 | 02/04/2021 | 0.98 | 0.23  | 1.46 | 0.61 |
| MW172 | 03/05/2021 | 3.99 | 0.67  | 6.33 | 3.50 |
| MW173 | 13/05/2021 | 0.47 | 0.29  | 0.75 | 0.56 |
| MW174 | 25/05/2021 | 0.97 | 0.55  | 1.73 | 1.67 |
| MW175 | 05/06/2021 | 0.53 | 0.25  | 0.75 | 0.30 |
| MW177 | 20/06/2021 | 0.22 | 0.20  | 0.30 | 0.21 |
| MW179 | 11/07/2021 | 0.38 | 0.18  | 0.61 | 0.34 |
| MW180 | 19/07/2021 | 0.21 | 0.22  | 0.45 | 0.55 |
| MW182 | 03/08/2021 | 0.51 | 0.68  | 1.07 | 1.68 |
| MW184 | 24/08/2021 | 0.59 | 1.01  | 1.33 | 2.42 |

|        |            |      |      |       |      |
|--------|------------|------|------|-------|------|
| MW187  | 13/09/2021 | 1.58 | 1.26 | 2.37  | 1.70 |
| MW189  | 27/09/2021 | 0.74 | 0.40 | 1.32  | 1.23 |
| MW190  | 04/10/2021 | 0.16 | 0.11 | 0.28  | 0.24 |
| MW193  | 06/11/2021 | 1.31 | 0.26 | 2.01  | 0.97 |
| MW194a | 15/11/2021 | 0.97 | 0.94 | 1.91  | 2.41 |
| MW194b | 25/11/2021 | 1.06 | 0.36 | 1.75  | 1.20 |
| MW195  | 04/12/2021 | 7.85 | 2.13 | 11.35 | 4.05 |

---
